# Supplementary material for: Importance of Genetic–Fitness Correlations for the Conservation of Amphibians
Source: MDPI journal article supplement (doi:10.3390/ani13223564), 2023-11-18
Supplement: s1 [file s1]

| Table S1: Information summary on species and their genetic diversity ( <b>GD</b> ), fitness proxies and correlations between both as well as interpretation of the results |                                                           |                                                                                                                                                                                                   |                                                                               |                      |                                                                                                                                                                                                     |                                                                                                                                                                                                                   |                             |
|----------------------------------------------------------------------------------------------------------------------------------------------------------------------------|-----------------------------------------------------------|---------------------------------------------------------------------------------------------------------------------------------------------------------------------------------------------------|-------------------------------------------------------------------------------|----------------------|-----------------------------------------------------------------------------------------------------------------------------------------------------------------------------------------------------|-------------------------------------------------------------------------------------------------------------------------------------------------------------------------------------------------------------------|-----------------------------|
| Species, study country, region, no. and size of SS                                                                                                                         | Molecular marker / method                                 | Genetic diversity                                                                                                                                                                                 | Proxy for fitness                                                             | Statistical model    | Correlation<br><b>Bold = significant</b>                                                                                                                                                            | Remarks / Interpretation of results                                                                                                                                                                               | Citation                    |
| <b><i>Bufo bufo</i></b><br>UK, TE<br>12 SS: 1) 8 small urban pop, N = 6 - 200 adults;<br>2) 4 large rural pop, N = 500 - 5000 adults                                       | 27 allozymes (12 SS)<br><br>3 minisats (5 SS)             | Urban Rural<br>F <sub>ST</sub> = 0.53 0.29<br>P = 14.8% 25%<br>Na/I = 1.18 1.36<br>F <sub>ST</sub> = 0.23 0.066<br>H <sub>O</sub> = 0.035 0.017<br>Na/I = 3.89 5.00<br>H <sub>O</sub> = 0.36 0.43 | Tad survival<br>Tad deformity                                                 | Correlation analyses | Survival Deformity<br>P: <b>r = 0.74</b><br>Na/I: <b>r = 0.67</b><br><br>H <sub>O</sub> : r = <b>-0.65</b><br><br>Na/I: r = 0.85                                                                    | Higher <b>GD</b> in large rural pops than in smaller urban pops. <b>GD</b> is pos. correlated with tadpole survival, but neg. with developmental abnormalities; reduction in <b>GD</b> and fitness in urban toads | Hitching & Beebee 1998 [36] |
| <b><i>Bufo calamita</i></b><br>UK, TE<br>38 SS (34 in UK)<br>variable N                                                                                                    | 8 microsat<br>33 SS                                       | P = 38-75%<br>Na/I = 1.5 - 2.8<br>H <sub>E</sub> = 0.19-0.34<br>H <sub>O</sub> = 0.22-0.38                                                                                                        | Tad survival<br>Tad growth rate<br>In 6 test SS                               | Correlation analyses | No correlation between survival and <b>GD</b> ; growth rate was correlated with H <sub>E</sub> (r=0.6 - <b>0.9</b> , P<0.01), H <sub>O</sub> , P, Na/I; low hatch rate in pop with lowest <b>GD</b> | H <sub>E</sub> lower in range edge pops; H <sub>E</sub> pos. correlated with fitness (growth rate); tad from smallest and isolated pop exhibited lowest fitness and H <sub>E</sub>                                | Rowe et al. 1999 [49]       |
| <b><i>Hyla arborea</i></b><br>Sweden, TE<br>10 SS (ponds)                                                                                                                  | 18 allozymes                                              | Mean <b>GD</b> : 1.06 alleles per locus                                                                                                                                                           | Egg hatch rate<br>Tadpole survival                                            | Correlation analyses | Very low <b>GD</b> ; no correlation with fitness                                                                                                                                                    | Survival was lower in isolated ponds compared to more central ponds                                                                                                                                               | Edenham et al. 2000 [54]    |
| <b><i>Bufo calamita</i></b><br>UK, TE<br>1 SS: large natural population, N ~ several thousand adults                                                                       | 5 microsat<br>Experiment: high & low food regime          | For individual tadpoles:<br>H = 0.42 - 0.73<br>Mean d <sup>2</sup> = 5.76-14.02<br>Outbreeding d <sup>2</sup> = 12.2 - 25.5<br>Scaled d <sup>2</sup> = 0.13 - 0.19                                | Tad survival<br>Tad growth rate<br>Tad developm. rate<br>Tad time to metamor. | Correlation analyses | No correlation between fitness and genetic measures; but fitness better under high food condition                                                                                                   | No relationship between fitness related traits and individual genetic diversity                                                                                                                                   | Rowe & Beebee 2001 [32]     |
| <b><i>Rana temporaria</i></b><br>UK, TE<br>1SS: large natural population with immigration, N ~ tens of adults                                                              | 7 microsat<br>Experiment: high & low food regime          | For individual tadpoles:<br>H = 0.50 - 0.65<br>Mean d <sup>2</sup> = 26.5 - 62.4<br>Outbreeding d <sup>2</sup> = 36.1 - 134.0<br>Scaled d <sup>2</sup> = 0.01 - 0.067                             | Tad survival<br>Tad growth rate<br>Tad develop. rate<br>Tad time to metamor.  | Correlation analyses | No correlation between fitness and genetic measures, but fitness better under high food condition                                                                                                   | No relationship between fitness related traits and individual genetic diversity                                                                                                                                   | Rowe & Beebee 2001 [32]     |
| <b><i>Bufo calamita</i></b><br>UK, TE<br>2 SS: 1) large pop several hundred toads                                                                                          | 8 microsat<br>Experiment: Pop X predation X competition X | No data: lower <b>GD</b> in small compared to large pop (extracted from Rowe et al. 1999)                                                                                                         | Tad survival<br>Tad growth rate                                               | Correlation analyses | Survival and growth rate (during first 10 days) higher in large than small pop. Predation & desiccation reduced survival; predation                                                                 | Lower fitness in small than large pop; best explained by increased genetic load in small isolated pop; pop at risk due to small N <sub>E</sub>                                                                    | Rowe & Beebee 2003 [48]     |

|                                                                                                                                         |                                                                                                   |                                                                                                                                                                                                    |                                                                                                                                                                                          |                                |                                                                                                                                                                                                                                                                                       |                                                                                                                                                                                      |                                    |
|-----------------------------------------------------------------------------------------------------------------------------------------|---------------------------------------------------------------------------------------------------|----------------------------------------------------------------------------------------------------------------------------------------------------------------------------------------------------|------------------------------------------------------------------------------------------------------------------------------------------------------------------------------------------|--------------------------------|---------------------------------------------------------------------------------------------------------------------------------------------------------------------------------------------------------------------------------------------------------------------------------------|--------------------------------------------------------------------------------------------------------------------------------------------------------------------------------------|------------------------------------|
| 2) small isolated pop<br>$N_C < 50$                                                                                                     | desiccation<br>treatment                                                                          |                                                                                                                                                                                                    |                                                                                                                                                                                          |                                | & competition reduced<br>growth rate                                                                                                                                                                                                                                                  |                                                                                                                                                                                      |                                    |
| <b><i>Rana temporaria</i></b><br>Finland, TE<br>4 SS<br>In all pops females $N < 100$                                                   | 8 microsats<br>Experiment:<br>3 temp. treatm:<br>14°C, 18°C, 22°C<br>Low & high food              | Individual Measures:<br>Parents: $H_O$ , $d^2$ , $r_{xy}$<br>Tad: $H_{EST}$ and $d^2_{EST}$ for<br>tadpoles                                                                                        | Tad survival<br>Tad develop. rate<br>Tad growth rate                                                                                                                                     | GLMM                           | Survival neg. correlated with<br>$r_{xy}$ , pos. correlated with $H_{EST}$ ,<br>( $d^2_{EST}$ n.s.), develop. rate<br>pos. correlated to $d^2_{EST}$ ,<br>growth rate neg. correlated<br>with $d^2_{EST}$                                                                             | <b>GD</b> interacts with food and<br>temperature; <b>GFCs</b> are<br>present for survival, seem<br>to be sensitive to<br>environment, more pro-<br>nounced in stressful<br>condition | Lesbarrères<br>et al. 2005<br>[50] |
| <b><i>Rana latastei</i></b><br>Italy, Slovenia, TE<br>6 SS: embryos from 10<br>clutches per pop                                         | 6 microsats<br>Experiment: high<br>and low expo-<br>sure of tad to<br><i>Ranavirus</i>            | AR<br>HS<br>P                                                                                                                                                                                      | Tad survival                                                                                                                                                                             | GEE,<br>Regression<br>analyses | Better survival in population<br>with higher <b>GD</b> in low<br>exposure treatment<br>( $P > 0.0001$ ); high exposure<br>led to high mortality                                                                                                                                       | Lower survival in western<br>isolated pops with low <b>GD</b><br>when exposed to novel<br>pathogen; eastern pops<br>have higher potential to<br>evolve resistance                    | Pearman &<br>Garner<br>2005 [55]   |
| <b><i>Rana sylvatica</i></b><br>Connecticut, TE<br>1 SS: $N \sim 110$ adults,<br>292 metamorphs (+ 1<br>SS with too low<br>sample size) | 9 microsats                                                                                       | Parental $r_{xy}$<br>Eggs / Tad: MLH                                                                                                                                                               | <u>In the wild</u><br>Sibship survival to<br>metamorphosis<br>Indiv. tadpole<br>weight<br><u>In the lab</u><br>Egg survival<br>Tadpole survival<br>Tadpole weight<br>Tadpole devel.stage | Linear<br>regression           | Sibship survival pos.<br>correlated with MLH ( $R^2 =$<br><b>0.30</b> ) and neg. correlated<br>with $r_{xy}$ ( $R^2 =$ <b>0.29</b> ),<br>weight not correlated with<br><b>GD</b><br><br>no correlation of fitness<br>proxies with MLH or $r_{xy}$ in<br>the lab                       | Inbreeding (measured as<br>MLH or $r_{xy}$ ) negatively<br>affects survival in the wild,<br>but not in the lab                                                                       | Halverson<br>et al. 2006<br>[56]   |
| <b><i>Rana sylvatica</i></b><br>Ohio, TE<br>12 SS                                                                                       | RAPD<br>Experiment: 3<br>UV-B radiation<br>treatm. of eggs:<br>sun light, filter,<br>acetat sheet | GSI for each population (no<br>data)                                                                                                                                                               | Egg survival<br>Tad survival<br>Tad deformity                                                                                                                                            | MANOVA                         | All 3 fitness traits neg.<br>correlated with <b>GD</b> ; Low <b>GD</b><br>correlated with higher larval<br>mortality and deformity<br>when exposed to UV-B light<br>(both $P > 0.0001$ )                                                                                              | Fragmented populations<br>with low <b>GD</b> might be at<br>increased risk of mortality<br>when interacting with<br>environmental stressors<br>like direct sun radiation             | Weyrauch<br>& Grubb<br>2006 [57]   |
| <b><i>Rana latastei</i></b><br>Italy, TE<br>10 SS: 4 isolated, 6<br>non-isolated pops                                                   | 6 microsats                                                                                       | Non-isolated / Isolated<br>Mean $p_w F_{ST} = 0.18 / F_{ST} = 0.34$<br>Estimate of <b>GD</b> : PCA score<br>including AR, P, $H_O$<br>AR = 1.4 – 2.6<br>$H_O = 0.12 - 0.23$<br>$H_E = 0.16 - 0.24$ | Egg hatch rate                                                                                                                                                                           | Correlation<br>analyses        | No correlation between <b>GD</b><br>and hatch rate ( $r = 0.14$ ,<br>$P = 0.75$ ), correlation ( $r =$ <b>0.82</b> ,<br>$P = 0.023$ ) when controlling<br>for distance from glacial<br>refugium; Hatch rate higher<br>in continuous (0.77-0.98)<br>than isolated (0.38-0.54)<br>pops. | Overall <b>GD</b> is low; <b>GD</b> lost<br>through recent isolation<br>had negative effect on<br>fitness; habitat restoration<br>is recommended                                     | Ficetola et<br>al. 2007<br>[39]    |

|                                                                                                                                                                                  |                                                                                                   |                                                                                                                                                                                                                                                         |                                                      |                                                    |                                                                                                                                                                                                                                                                                                                                                  |                                                                                                                                                                                                                                                                       |                                    |
|----------------------------------------------------------------------------------------------------------------------------------------------------------------------------------|---------------------------------------------------------------------------------------------------|---------------------------------------------------------------------------------------------------------------------------------------------------------------------------------------------------------------------------------------------------------|------------------------------------------------------|----------------------------------------------------|--------------------------------------------------------------------------------------------------------------------------------------------------------------------------------------------------------------------------------------------------------------------------------------------------------------------------------------------------|-----------------------------------------------------------------------------------------------------------------------------------------------------------------------------------------------------------------------------------------------------------------------|------------------------------------|
| <b><i>Rana temporaria</i></b><br>Sweden, TE<br>6 areas with 9 SS each;<br>3 fragmented (F) and<br>3 continuous (C)<br>areas: N <sub>F</sub> = 6-154, N <sub>C</sub> =<br>25-1470 | 7 microsats<br>Experiment:<br>4 fragmented &<br>4 continuous SS<br>with low vs. high<br><b>GD</b> | Fragmented / Continuous<br>Global F <sub>ST</sub> = 0.071 F <sub>ST</sub> = 0.02<br>AR = 3.3 – 3.7 AR = 4.3 – 5.0<br>H <sub>O</sub> = 0.50-0.62 H <sub>O</sub> = 0.71-0.78<br>H <sub>S</sub> = ??                                                       | Tad body size<br>Tad survival probab.                | Correlation<br>analyses                            | Body size Survival probab.<br>Ho: <b>r = 0.73</b> Ho: <b>r = 0.77</b><br>Hs: r = 0.70 Hs: <b>r = 0.88</b><br>AR: r = 0.31 AR: r = 0.70                                                                                                                                                                                                           | Higher <b>GD</b> in continuous<br>habitat; positively<br>correlated with fitness<br>traits; larvae from frag.<br>habitat were smaller and<br>survived less                                                                                                            | Johansson<br>et al. 2007<br>[37]   |
| <b><i>Rana temporaria</i></b><br>Finland, TE,<br>2 SS = 2 ponds,<br>small N                                                                                                      | 8 microsats                                                                                       | Individual H <sub>O</sub> of tad,<br>father(sire) and dam<br>(mother)                                                                                                                                                                                   | Tad weight<br>Tad age at<br>metamorphosis            | GLMM                                               | Tad weight was influenced<br>by H <sub>O</sub> (Linear Model;<br>P<0.001) and dam H <sub>O</sub><br>(P<0.047); no genetic but<br>“pond” influence on age at<br>metamorph.                                                                                                                                                                        | Since weight is correlated<br>with fitness in amphibians,<br><b>GD</b> might be an important<br>component of individual<br>fitness in <i>R. temporaria</i>                                                                                                            | Lesbarrères<br>et al. 2007<br>[58] |
| <b><i>Bufo calamita</i></b><br>Sweden, TE<br>6 SS<br>all pops are large                                                                                                          | 105 AFLPs<br>Experiment: 3<br>temp. treatm:<br>27°, 19°C, variable                                | Global F <sub>ST</sub> = 0.16<br>Pairwise F <sub>ST</sub> = 0.06-0.27<br>47-91% variable AFLP loci                                                                                                                                                      | Tad survival                                         | GLMM                                               | <b>GD</b> positively correlated with<br>survival in cold treatment<br>(19°C) where survival was<br>highest (P = 0.016)                                                                                                                                                                                                                           | Low genetic variation does<br>not seem to cause a<br>fitness cost under stressful<br>condition (variable temp.)                                                                                                                                                       | Rogell et al.<br>2010 [38]         |
| <b><i>Rana temporaria</i></b><br>UK, TE<br>8 SS<br>Urban (4 SS) and rural<br>(4SS) habitats                                                                                      | 9 microsats<br>MHC II β exon 2<br>Experiment:<br>3 temperature<br>regimes: 10°C,<br>14°C, 21°C    | Mean pw Msat F <sub>ST</sub> = 0.051,<br>Mean pw MHC F <sub>ST</sub> = 0.099<br>Microsats: Rural Urban<br>AR = 6.3-6.9, AR = 5.8-6.8<br>H <sub>O</sub> = 0.62-0.74 H <sub>O</sub> = 0.68-0.84<br>H <sub>E</sub> = 0.68-0.72, H <sub>E</sub> = 0.68-0.73 | Tad growth rate<br>Tad survival                      | Correlation<br>analyses,<br>Chi <sup>2</sup> -Test | No correlation between <b>GD</b><br>(both markers) and fitness;<br>Dying vs. surviving tad: MHC<br>allele C was over-<br>represented, allele H was<br>underrepresented in dead<br>tad                                                                                                                                                            | No differences in <b>GD</b> or<br>survivorship between rural<br>and urban pops; growth<br>rate higher in urban areas.<br>Functional loci are<br>important when assessing<br>pop genetic health                                                                        | Zeisset &<br>Beebee<br>2010 [40]   |
| <b><i>Hyla arborea</i></b><br>France, TE<br>4 SS: 2 large and 2<br>small, isolated &<br>genetically eroded<br>pops                                                               | 15 microsats<br>Experiment:<br>inter- and<br>intrapopulational<br>crosses                         | Estimates of H <sub>EST</sub> per family                                                                                                                                                                                                                | Tad body mass,<br>Tad length<br>Tad stage at day 23  | Linear<br>model                                    | Tad performances better in<br>non-frag. pops than isolated<br>pops; correlated with H <sub>EST</sub> :<br>Stage: F = 14.19, P < 0.001;<br>Mass: F = 9.18, P = 0.003;<br>Length: F = 10.77, P = 0.001<br>Stage and length increased in<br>interpop. crosses in isolated<br>pops; mass increased in<br>crosses from isolated and<br>non-frag. pops | Inbreeding depression<br>(within) vs fixation load<br>(among pops)? Support for<br>genetic drift leading to<br>fixation of slightly<br>deleterious alleles;<br>translocating individ. from<br>moderately divergent<br>pops might increase<br>fitness in tadpole stage | Luquet et<br>al. 2011<br>[59]      |
| <b><i>Bufo calamita</i></b><br>UK, TE<br>Region 1: uninfected,<br>N <sub>C</sub> = 140                                                                                           | 8 microsats<br>MHC II β exon 2                                                                    | <u>Microsats</u> :<br>Region 1 Region 2<br>H <sub>E</sub> = 0.1 H <sub>E</sub> = 0.41<br>AR = 1.33 AR = 3.14<br>5 <b>MHC</b> allele frequency                                                                                                           | Tad growth rate<br>Tad develop. time<br>Tad survival | KW-ANOVA,<br>Chi <sup>2</sup> -Test                | Microsat <b>GD</b> not correlated<br>to fitness. No differences in<br>fitness between infected and<br>uninfected region; toads in<br>both areas equally healthy.                                                                                                                                                                                 | Certain MHC alleles might<br>be associated with<br>infection. Directional<br>selection favouring alleles<br>conferring resistance to <b>Bd</b>                                                                                                                        | May et al.<br>2011 [52]            |

|                                                                                                                     |                                                                                     |                                                                                                                                                                    |                                                                                                                         |                                                   |                                                                                                                                                                                             |                                                                                                                                                                                                                |                              |
|---------------------------------------------------------------------------------------------------------------------|-------------------------------------------------------------------------------------|--------------------------------------------------------------------------------------------------------------------------------------------------------------------|-------------------------------------------------------------------------------------------------------------------------|---------------------------------------------------|---------------------------------------------------------------------------------------------------------------------------------------------------------------------------------------------|----------------------------------------------------------------------------------------------------------------------------------------------------------------------------------------------------------------|------------------------------|
| Region 2: infected with <b>Bd</b> , N <sub>c</sub> = 282                                                            |                                                                                     |                                                                                                                                                                    |                                                                                                                         |                                                   | MHC diversity higher in uninfected region.                                                                                                                                                  |                                                                                                                                                                                                                |                              |
| <b>Lithobates yavapaiensis</b><br>Arizona, ST<br>5 SS                                                               | MHC II $\beta$ exon 2<br>14 microsats<br><b>Bd</b> infection experiments: yes or no | Individual and population MHC heterozygosity and MHC allele frequencies<br>Population structure (microsats): K = 6                                                 | Adult frog survival                                                                                                     | Cox proportional hazard model, Fishers exact test | MHC heterozygotes & MHC allele Q associated with survival                                                                                                                                   | Variation among pops in <b>Bd</b> infection and MHC alleles. Fitness advantage conveyed by MHC heterozygosity & allele Q                                                                                       | Savage & Zamudio 2011 [67]   |
| <b>Hyla arborea</b><br>France, TE<br>5SS: 3 large and 2 small, isolated & genetically eroded pops                   | Intrapopul.<br>Crosses: 5 – 9 clutches<br>Low & high <b>Bd</b> dose                 | <b>GD</b> known from previous studies                                                                                                                              | Tad stage at metamorphosis<br>Tad mass<br>Tad time to metamor.<br>Survival of froglets                                  | GLMM, ANOVA, ANCOVA                               | No <b>Bd</b> detection in adults or tad; Longer time to metamor. in isolated pops exposed to high <b>Bd</b> ; Mass higher in isolated pops, but more reduced when exposed to high <b>Bd</b> | Tad seem to prevent or clear infections rapidly; At high <b>Bd</b> dose survival of froglets from nonfragmented pops. slightly higher, but survival higher & higher mass of isolated tadpoles in control group | Luquet et al. 2012 [47]      |
| <b>Hyla arborea</b><br>France, TE<br>4 SS: 2 large and 2 small, isolated & genetically eroded pops                  | 15 microsats<br>n = 150 females, 296 males                                          | Na/I = 3.6 – 5.6<br>AR = 3.6 – 5.5<br>H <sub>E</sub> = 0.37-0.46<br>H <sub>O</sub> = 0.38 -0.46<br>F <sub>IS</sub> = -0.08 – 0.04<br>Indiv. MLH                    | Adult body size<br>Body condition<br>Reproductive investment: males: chorus attendance; females: clutch mass & egg size | Linear models                                     | No correlation between fitness measurements and indiv. MLH; larger frogs invested more in reproduction.                                                                                     | Lack of <b>GFC</b> on adult traits probably because inbreeding is low in these populations; ( <i>inbreeding avoidance by female mate choice?</i> ); or selection against unfit genotypes in tad                | Luquet et al. 2013 [60]      |
| <b>Lithobates sevosus</b><br>Mississippi, ST<br>1 SS, isolated and small pop size, probably inbred and bottlenecked | 8 microsats                                                                         | Individuals: eggs metamorphs, adults: MLH<br>IR                                                                                                                    | Egg mortality<br>Tad survival to metamorphosis                                                                          | Regression analyses                               | MLH positively correlated with survival of egg clutches ( $r^2 = 0.15$ ); Metamorphs had lower F <sub>IS</sub> , lower IR and greater MLH than adults and eggs!                             | Conclusion: most inbred tad did not survive to metamorphosis; survival of individual with greater <b>GD</b> might prolong persistence of isolated pop                                                          | Richter & Nunziata 2013 [61] |
| <b>Anaxyrus boreas</b><br>USA, Montana, TE<br>One large sample area: Glacier National Park                          | 11 microsats<br><b>Bd</b> : n =199                                                  | AR = 9.9-13.0 (for 3 groups)<br>H <sub>O</sub> = 0.62-0.71<br>H <sub>E</sub> = 0.68-0.74<br>F <sub>IS</sub> = 0.04-0.09<br>Indiv. MLH<br>Population structure: K=2 | Adults (> 1year old) <b>Bd</b> presence                                                                                 | Hierarchical logistic regression model            | Overall toads have high genetic diversity<br><br>MLH was positively related to <b>Bd</b> infection (P=0.03)                                                                                 | Population effect: immigration might increase heterozygosity as well as greater exposure to <b>Bd</b>                                                                                                          | Addis et al. 2015 [45]       |
| <b>Lithobates yavapaiensis</b><br>Arizona, ST<br>12 SS                                                              | 14 microsats<br><br>19 bioclimatic variables                                        | pw F <sub>ST</sub> = 0.17-0.60 (mean = 0.32)<br>AR, F <sub>IS</sub> ,<br>H <sub>O</sub> = 0.38 – 0.68                                                              | Adults <b>Bd</b> intensity<br><b>Bd</b> prevalence                                                                      | GLMs                                              | AR + H <sub>O</sub> highest in <b>Bd</b> tolerant pops, intermediate in susceptible, and lowest in uninfected pops; Host <b>GD</b>                                                          | Warmer temp. associated with higher <b>Bd</b> prevalence & intensity; Mortality lower in pops with higher                                                                                                      | Savage et al. 2015 [41]      |

|                                                                                                   |                                                        |                                                                                                      |                                                                            |               |                                                                                                                                                                  |                                                                                                                                                                                             |                            |
|---------------------------------------------------------------------------------------------------|--------------------------------------------------------|------------------------------------------------------------------------------------------------------|----------------------------------------------------------------------------|---------------|------------------------------------------------------------------------------------------------------------------------------------------------------------------|---------------------------------------------------------------------------------------------------------------------------------------------------------------------------------------------|----------------------------|
|                                                                                                   | (related to temp. & precipitation)                     | Population structure: K=10                                                                           | Mortality prevalence per population                                        |               | (PC calculated from Ho, Fis, AR) alone explained mortality $r^2 = 0.499$ , $P=0.015$                                                                             | <b>GD</b> measures; <b>GD</b> lowers <b>Bd</b> susceptibility, important to preserve <b>GD</b> for species persistence                                                                      |                            |
| <i>Physalaemus pustulosus</i> ,<br>Panama, TR<br>3 SS: 2 lowland, 1 highland, sampled 2010 & 2103 | 5 microsats<br>MHC II $\beta$ 1                        | High genetic diversity:<br>$H_E = 0.57 - 0.93$<br>(across loci)<br>MHC II $\beta$ 1 allele frequency | Adults<br><b>Bd</b> infection                                              | ?             | Lowland frogs less infected than highland frogs; higher frequency of MHC II $\beta$ 1 P9 alleles associated with resistance to <b>Bd</b> in highland populations | Strong selection on MHC II $\beta$ 1 P9 alleles in highly infected populations. Potential fitness cost: Homozygosity at this loci may decrease capacity to bind antigens of other pathogens | Kosch et al. 2016 [68]     |
| <i>Pseudacris ornata</i><br>SE USA, ST<br>15 SS                                                   | 7 microsats<br>n = 327                                 | AR<br>$H_E$                                                                                          | Adults<br><b>Bd</b> infection<br>11 (out of 15) pops. infected with Bd     | GLMs          | Pop average $H_E$ correlated with <b>Bd</b> prevalence; Decreasing temperature correlated with increasing <b>Bd</b> prevalence and <b>Bd</b> intensity           | Possibly in pop. with now low prevalence, selection has pushed tolerant genotypes towards fixation resulting in decreased heterozygosity                                                    | Horner et al. 2017 [51]    |
| <i>Bombina variegata</i><br>Germany, TE<br>19 SS<br>$N_E = 24-128$                                | 6 microsats<br>n = 274                                 | Indiv. MLH<br>$H_E$                                                                                  | Adults<br><b>Bd</b> infection<br>14 out of 19 pops infected with <b>Bd</b> | GLMs          | No correlation between indiv. MLH or pop level $H_E$ with <b>Bd</b> infection                                                                                    | <b>Bd</b> presence did not influence survival or body condition; no evidence that genetic diversity or environmental variables affect <b>Bd</b> infection probability                       | Wagner et al. 2017 [62]    |
| <i>Plethodon cinereus</i><br>Virginia, TE<br>1SS                                                  | 7 microsats<br>n = 109 adults<br>n = 35 juveniles      | Indiv. MLH                                                                                           | Adult home range size<br>Juvenile growth                                   | GLM, GLMM     | MLH pos. correlated with home range size; tendency that MLH pos. affects growth, no effect of MLH on survival                                                    | <b>GD</b> might influence behaviour and growth via foraging                                                                                                                                 | Liebgold et al. 2018 [63]  |
| <i>Hynobius tokyoensis</i><br>Japan, ST<br>32 SS<br>$N_C = 1 - 117$                               | Cytb<br>5 microsats                                    | $\pi = 0.00 - 0.04$<br>$H_E = 0.10 - 0.51$                                                           | Hatchability of clutches in the field                                      | Path analysis | For both species: Temperature, altitude & land-use explained <b>GD</b>                                                                                           |                                                                                                                                                                                             | Okamiya & Kusano 2018 [33] |
| <i>Rana ornativentris</i><br>Japan, ST<br>38 SS<br>$N_C = 2 - 500$                                | Cytb<br>4 climatic, 3 topographic & 4 land-use variab. | $\pi = 0.00-0.24$                                                                                    | Hatchability of clutches in the field                                      | Path analysis | <b>GD</b> positively affected mean hatchability (path analysis coefficient = 0.27, for both species together)                                                    | Forested area ratio positively affected population size (n.s.), <b>GD</b> and mean hatchability                                                                                             |                            |

|                                                                                                                         |                                                                                               |                                                                                                                                                                                                                           |                                                                                                                                                                                                            |                                     |                                                                                                                                                                                                                                                                       |                                                                                                                                                                                 |                                  |
|-------------------------------------------------------------------------------------------------------------------------|-----------------------------------------------------------------------------------------------|---------------------------------------------------------------------------------------------------------------------------------------------------------------------------------------------------------------------------|------------------------------------------------------------------------------------------------------------------------------------------------------------------------------------------------------------|-------------------------------------|-----------------------------------------------------------------------------------------------------------------------------------------------------------------------------------------------------------------------------------------------------------------------|---------------------------------------------------------------------------------------------------------------------------------------------------------------------------------|----------------------------------|
| <p><b><i>Pseudophryne corroboree</i></b><br/>Australia, ST<br/>4 SS, small census size<br/>N<sub>C</sub> = 13 males</p> | <p>SNPs<br/>n = 16 - 22</p> <p>MHC IA<br/>n = 16 – 22<br/>Experiment: <b>Bd</b> infection</p> | <p>Indiv. genome-wide H<br/>H<sub>E</sub> = 0.33 – 0.37<br/>H<sub>O</sub> = 0.36 – 0.40<br/>F<sub>IS</sub> = -0.050 – -0.073<br/>AR = 1.34 – 1.38<br/>F<sub>ST</sub> = 0.106 – 0.191<br/>Population structure K=2</p>     | <p>Adult frogs<br/>Infection load<br/>Number of days survived</p>                                                                                                                                          | <p>GWAS</p>                         | <p>Indiv. genome-wide H pos. correlated with survival; 1 MHC allele associated with high infection load; 2 MHC alleles more common in susceptible pops, one MHC allele neg. associated with survival; some putative adaptive SNPs associated with survival (n.s.)</p> | <p><b>GD</b> associated with survival; the resistant pop M had highest level of <b>GD</b>; Adaptive SNP and MHC variants important for breeding more resistant individuals.</p> | <p>Kosch et al. 2019 [42]</p>    |
| <p><b><i>Rana sylvatica</i></b><br/>Maryland, TE<br/>15 SS (ponds)</p>                                                  | <p>MHC IIB exon sequencing and supertyping<br/>n = 381</p>                                    | <p><math>\pi</math> = 0.059<br/>TD = 1.72</p>                                                                                                                                                                             | <p>Tad <i>Ranavirus</i> prevalence<br/><i>Ranavirus</i> infection intensity</p>                                                                                                                            | <p>Hurdle model</p>                 | <p>Infection intensity was associated with MHC heterozygosity (P&lt;0.001), lowest in indiv. with MHC genotype ST1/ST7; prevalence without genetic association</p>                                                                                                    | <p>MHC heterozygotes have a 23fold lower infection intensity compared to homozygotes; MHC functional genetic variation is important for <i>Ranavirus</i> susceptibility</p>     | <p>Savage et al. 2019 [64]</p>   |
| <p><b><i>Litoria verreauxii</i></b><br/>Australia, alpine, ST<br/>10 SS:<br/>2 with &amp; 8 without <b>Bd</b></p>       | <p>Genomic DNA: SNPs (GBS)<br/>6 SS<br/>n = 50 each site</p>                                  | <p>Indiv. H<sub>O</sub><br/>mean number of alleles: 1.37-1.91<br/>mean H<sub>O</sub> = 0.12-0.26,<br/>mean H<sub>E</sub> = 0.11-0.23<br/>Population structure: K=10</p>                                                   | <p>Adult frogs<br/><b>Bd</b> infection presence<br/><b>Bd</b> infection intensity</p>                                                                                                                      | <p>GLMs,<br/>Fishers exact test</p> | <p>No differences in <b>GD</b> between sample sites with and without <b>Bd</b>; No relationship between ind. infection intensity and H<sub>O</sub>; but frogs with higher H<sub>O</sub> were less likely to be infected</p>                                           | <p>Large pop effect on infection rate; No <b>Bd</b> in isolated pops; Maintenance of genetic diversity is crucial in pops infected with <b>Bd</b></p>                           | <p>Banks et al. 2020 [46]</p>    |
| <p><b><i>Bombina variegata</i></b><br/>Germany, TE<br/>16 SS (7 focal sample sites, including 2 inbred subpops)</p>     | <p>9 microsats<br/>n =300<br/><b>Bd</b> infection<br/>n =577</p>                              | <p>Indiv. MLH<br/>H<sub>E</sub> = 0.49-0.65,<br/>H<sub>O</sub> = 0.34-0.73<br/>H<sub>S</sub> = 0.44-0.55<br/>F<sub>IS</sub> = -0.4 – 0.26<br/>AR = 1.48-1.59<br/>N<sub>pa</sub> = 0-6<br/>Population structure: K = 3</p> | <p>Adult toads<br/><b>Bd</b> prevalence per pop<br/><b>Bd</b> presence / indiv.<br/><b>Bd</b> intensity/ indiv.<br/><b>Bd</b> in 15 out of 16 SS<br/>Prevalence: 7.1 - 85.7%<br/>Intensity: 0 - 570 GE</p> | <p>GLMs</p>                         | <p>Infection presence correlated with indiv. MLH; No correlation between MLH and infection intensity</p>                                                                                                                                                              | <p>No <b>Bd</b> associated mortality; <b>Bd</b> infection prob. highest in toads with low genetic diversity and isolated, inbred pops.</p>                                      | <p>Oswald et al. 2021 [65]</p>   |
| <p><b><i>Rana pipiens</i></b><br/>Northamerica, TE<br/>14 SS<br/>N<sub>E</sub> = 37 - 4861</p>                          | <p>7 microsats<br/>n = 428<br/>mtDNA haplotypes<br/>n = 94</p>                                | <p>H<sub>E</sub> = 0.59 – 0.92<br/>H<sub>O</sub> = 0.67 – 0.89<br/>AR = 5.5 – 13.9<br/>H<sub>E</sub> = 0.00 – 0.76<br/>TD = -2.03 – 0.77<br/>H<sub>E</sub> = 0.00 – 0.90</p>                                              | <p>Adult frogs<br/><b>Bd</b> prevalence<br/><b>Bd</b> intensity<br/><b>Bd</b> in 8 out of 14 SS<br/>Prevalence : 5.0 – 100%</p>                                                                            | <p>GLMs</p>                         | <p><b>Bd</b> prevalence neg. correlated with MHC H<sub>E</sub><br/>MHC allele <i>Rapi*03</i> associated with reduced risk of infection (n.s); MHC <i>supertype 4</i> associated with</p>                                                                              | <p>Populations (2SS) with smallest N<sub>E</sub> also had lowest MHC diversity; MHC <b>GD</b> correlated with prevalence; neutral <b>GD</b> not correlated with <b>Bd</b>.</p>  | <p>Trujillo et al. 2021 [53]</p> |

|                                                                                                                                                                                                                                                                                                               |                                                                                                                                                                                                                                    |                                                                                                                                                                                                                                                        |                                                   |                                      |                                                                                                                                                                                                                                                                    |                                                                                                                                                                                                                    |                                  |
|---------------------------------------------------------------------------------------------------------------------------------------------------------------------------------------------------------------------------------------------------------------------------------------------------------------|------------------------------------------------------------------------------------------------------------------------------------------------------------------------------------------------------------------------------------|--------------------------------------------------------------------------------------------------------------------------------------------------------------------------------------------------------------------------------------------------------|---------------------------------------------------|--------------------------------------|--------------------------------------------------------------------------------------------------------------------------------------------------------------------------------------------------------------------------------------------------------------------|--------------------------------------------------------------------------------------------------------------------------------------------------------------------------------------------------------------------|----------------------------------|
|                                                                                                                                                                                                                                                                                                               | MHC IIB exon 2<br>N=272<br>Environmental predictors                                                                                                                                                                                | H <sub>0</sub> = 0.00 - 0.86<br>AR = 1.0 – 6.5<br>TD = -0.35 – 3.19                                                                                                                                                                                    | Intensity: 40.7 – 35706 GE                        |                                      | increased risk of infection (P=0.03).<br><b>Bd</b> intensity was affected only by environm. variables: rainfall, temperature, latitude                                                                                                                             | Most measures of neutral and adaptive <b>GD</b> not correlated.<br>Adaptation to disease seems possible though selection on MHC genes.                                                                             |                                  |
| <b><i>Atelopus varius &amp; zeteki</i></b><br>Panama, TR<br>8 SS with declining or extinct pops, small N <sub>E</sub>                                                                                                                                                                                         | Transcriptome sequencing , exome –capture assay to sequence coding regions<br>Decrease in genetic diversity<br>Pop. Structure K=8, no clear separation between <i>A. varius</i> and <i>zeteki</i> (but <i>zeteki</i> pops extinct) |                                                                                                                                                                                                                                                        | Adult frogs<br>Survival after <b>Bd</b> infection | Fishers exact test                   | Immune related gene variants (outlier SNPs) associated with contemporary survivors after <b>Bd</b> caused declines (e.g. toll-like receptor genes)                                                                                                                 | The study uncovered candidate genes related to immune system and skin integrity. Admixture in one pop point to potential of genetic rescue                                                                         | Byrne et al. 2021 [69]           |
| <b><i>Six species</i></b><br>Brasil, TR<br>3 forest specialists<br><i>Aplastodiscus leucopygius</i><br><i>Ischnocnema henselii</i><br><i>Boana semmlineata</i><br>& 3 habitat generalists<br><i>Dendrosophus minutus</i><br><i>Boana polytaenia</i><br><i>Dendrosophus branneri</i><br>6 areas, 2SS / species | MHC IIB Exon2 genotyping;<br>Genomic data: SNPs (ddRAD seq.)                                                                                                                                                                       | N <sub>A</sub> , H <sub>E</sub> , H <sub>O</sub> , π<br>Indiv: heterozygosity<br>Lower MHC H <sub>E</sub> in fragmented forest compared to continuous forest; MHC diversity was inversely related to ddRAD diversity<br><br>NO DATA FOR SINGLE SPECIES | Adult frogs<br><b>Bd</b> infection                | GLMs, T-Test, Chi <sup>2</sup> -Test | Reduced pop level MHC diversity (H <sub>E</sub> , H <sub>O</sub> , but not π) correlated with increased <b>Bd</b> infection; no correlation with neutral genetic diversity (ddRAD); MHC IIB heterozygote indiv. tended to be less infected than homozygotes (n.s.) | <b>Bd</b> prevalence highest in fragmented forest and forest specialist; Habitat fragmen-tation increases <b>Bd</b> infection susceptibility mediated through erosion of immunogenetic diversity                   | Belasen et al. 2022 [34]         |
| <b><i>Eleutherodactylus coqui</i></b><br>Puerto Rico, TR<br>1 SS,<br>N <sub>c</sub> = 141;<br>Bottlenecked pop.<br>Probably in decline                                                                                                                                                                        | Genomic data: SNPs (GBS)<br>n = 77<br>Anti- <b>Bd</b> bacterium<br>Microbiome                                                                                                                                                      | F <sub>IS</sub> : 0.04-0.72<br>HR: 0.57-4.38                                                                                                                                                                                                           | Adults frogs<br><b>Bd</b> infection               | Structural equation models           | Frogs with low HR were more likely to be infected; no correlation between microbiome diversity and HR<br>Abundance of anti- <b>Bd</b> bacterium higher in infected frogs                                                                                           | Offsetting effect: frogs with higher HR were less likely to be infected; but frogs with higher HR and infected frogs showed higher bacterium abundance; study highlights importance to study multiple interactions | Torres-Sanchez & Longo 2022 [66] |

Abbreviations: **SS** = sample site, **TE** = Temperate region, **ST**= Subtropical region, **TR** = Tropical region, **n** = no. of individual investigated, **Pop** = population, **Tad** = tadpoles, **K** = no. of genetic cluster according to Bayesian assignment analysis (pop. Structure); **N** = pop size; **N<sub>c</sub>**= census pop size, **N<sub>E</sub>** = effective pop size, **Bd** = Chytrid fungus (*Batrachochytrium dendrobatidis*); **pw** = pairwise

Genetic diversity (**GD**) estimates: **P** = % polymorphic loci, **Na/I** = no. of alleles /locus, **H<sub>E</sub>** = expected heterozygosity, **H<sub>O</sub>** = observed heterozygosity, **H** = individual heterozygosity, **F<sub>IS</sub>** = inbreeding coefficient; mean **d<sup>2</sup>** = squared distance (in repeat units) between the two alleles within a locus, averaged over all loci analysed in an individual (Coulson et al. 1998); **H<sub>EST</sub>** and **d<sup>2</sup><sub>EST</sub>** estimated from parental genotypes, **r<sub>xy</sub>**, a pairwise relatedness estimator which measures the relatedness of the parents used in the common garden experiment (Queller & Goodnight 1989), **AR** = allelic richness, **HS** = gene diversity (microsats), **Npa** = no. of private alleles, **F<sub>ST</sub>** = fixation index (population structure), **MLH** = indiv. multilocus heterozygosity, **IR** = ind. internal relatedness, **N<sub>A</sub>** = allelic diversity (MHC alleles), **GSI** = Gini-Simpson Index (RAPD), **Nh** = Number of haplotypes, **h** = haplotype diversity, **π** = nucleotide diversity, **NE** = Effective number of alleles, **TD** = Tajima's D, **HR** = Heterozygous/homozygous ratio, **HFC** = heterozygosity – fitness correlation, **GFC** = Genetic variability fitness correlations
